# Supplementary material for: Near-Infrared Light-Triggered Nitric Oxide Nanogenerators for NO-Photothermal Synergistic Cancer Therapy
Source: Nanomaterials (Basel). 2022 Apr 14;12(8):1348. doi: 10.3390/nano12081348 (PMC9029494; doi:10.3390/nano12081348)
Supplement: Supplementary file 1 [file nanomaterials-12-01348-s001.zip › nanomaterials-1666101-supplementary.pdf]

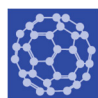

## Article

# Near-Infrared Light-Triggered Nitric Oxide Nanogenerators for NO-Photothermal Synergistic Cancer Therapy

Weiwei Liu <sup>1,2</sup>, Farouk Semcheddine <sup>1</sup>, Zengchao Guo <sup>1</sup>, Hui Jiang <sup>1,\*</sup> and Xuemei Wang <sup>1,\*</sup>

<sup>1</sup> State Key Laboratory of Bioelectronics, National Demonstration Center for Experimental Biomedical Engineering Education, School of Biological Science and Medical Engineering, Southeast University, Nanjing 210096, China; liuw182@163.com (W.L.); fou\_semch@yahoo.fr (F.S.); rmcqh242526@163.com (Z.G.)

<sup>2</sup> School of Chemistry and Chemical Engineering, Southeast University, Nanjing 210096, China

\* Correspondence: sungi@seu.edu.cn (H.J.); xuewang@seu.edu.cn (X.W.)

## Supplementary Figures

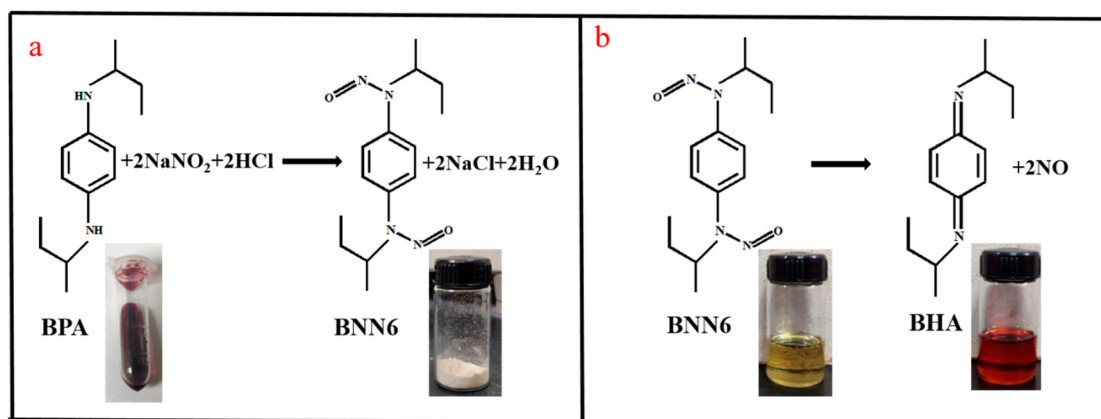

**Figure S1.** (a) The synthesis route of BNN6 and the change from red liquid to beige solid in the reaction process (inset digital pictures); (b) The decomposition route of BNN6 and the color change during decomposition (inset digital pictures).

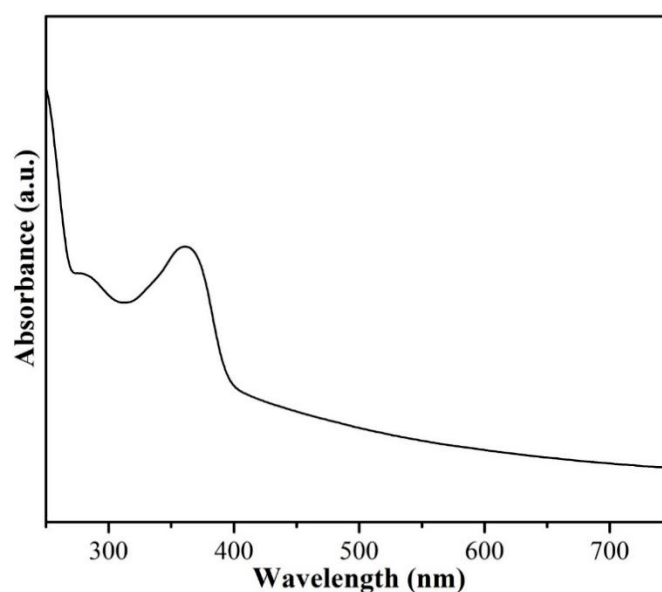

**Figure S2.** UV-vis absorption spectra of BNN6.

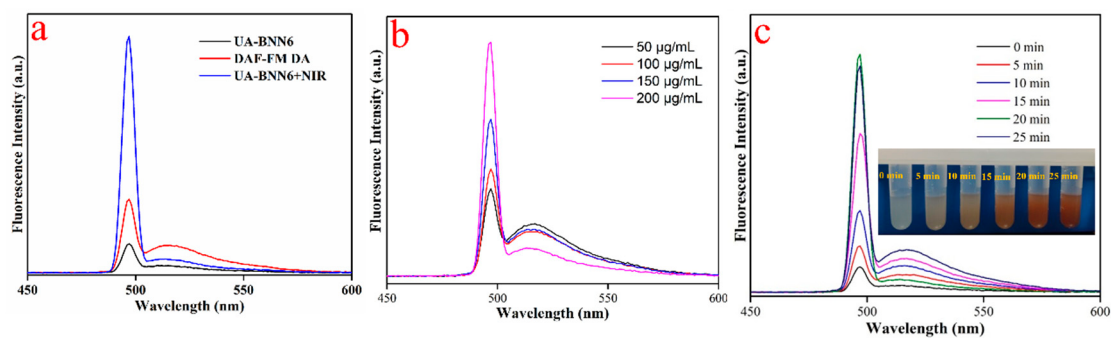

**Figure S3.** (a) Fluorescence curve of DAF-FM DA, of UA-BNN6 and of UA-BNN6+NIR. (b) Fluorescence curves of PBS solutions of UA-BNN6 with different concentrations after irradiation by NIR (808 nm,  $1.0 \text{ W cm}^{-2}$ ). (c) Fluorescence curve of UA-BNN6 PBS solution (200  $\mu\text{g/mL}$ ) after irradiation NIR for different time. Inset: the color change during decomposition.

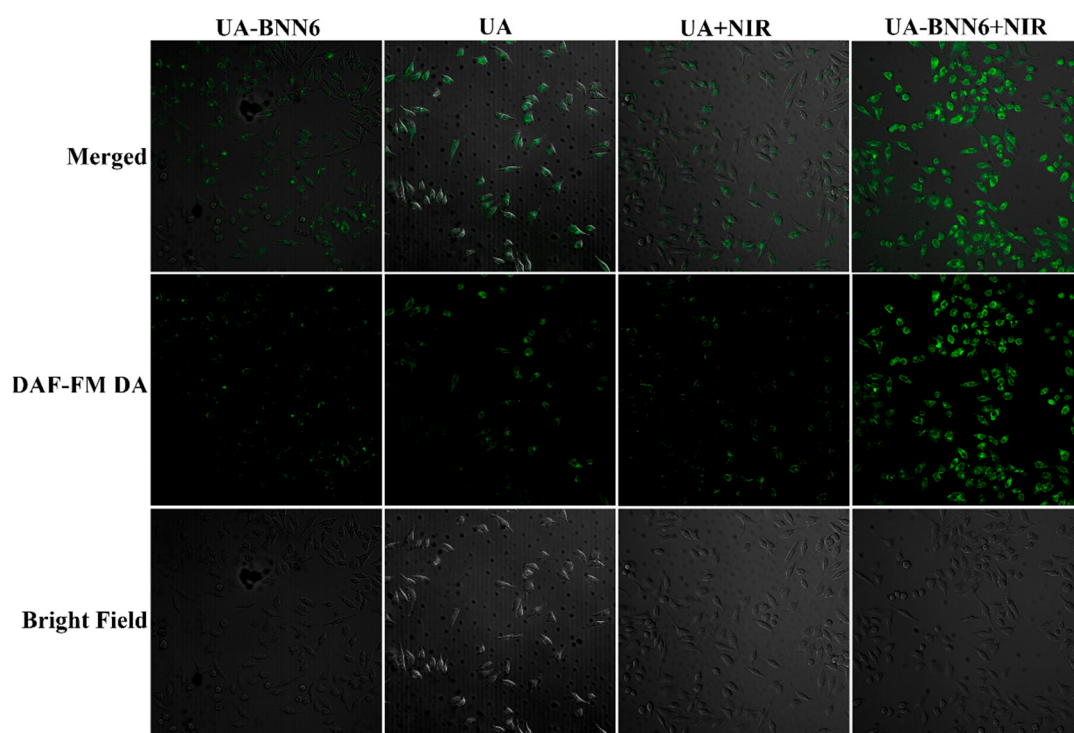

**Figure S4.** Confocal images of intracellular generation of NO in HeLa cells after treatment with UA, UA-BNN6, UA+NIR and UA-BNN6+NIR.

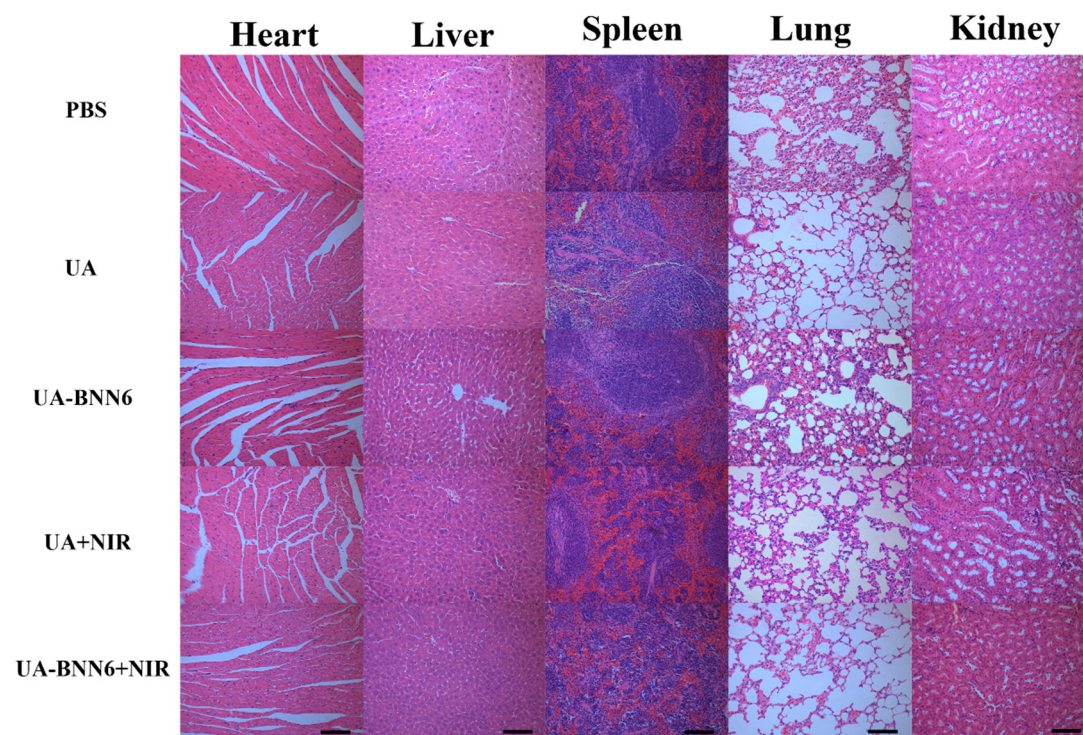

**Figure S5.** H&E staining of tissue sections of main organs and tumors in nude mice (scale bars 100  $\mu\text{m}$ ).
